# Supplementary material
Source: PubMed Central journal article supplement (PMC4584170)
Supplement: NIHMS677919-supplement-supplement_1.pdf [file NIHMS677919-supplement-supplement_1.pdf]

62 Supplementary Table 1. The 20 food groupings used in the dietary cluster analysis<sup>1</sup>

| <b>Food group</b>      | <b>Foods in the group</b>                                                                                                                                                                                                                                                                                                                                                                                                                                                                    |
|------------------------|----------------------------------------------------------------------------------------------------------------------------------------------------------------------------------------------------------------------------------------------------------------------------------------------------------------------------------------------------------------------------------------------------------------------------------------------------------------------------------------------|
| Beans and peas         | Beans, lentils, peas, lima beans, tofu, soybeans                                                                                                                                                                                                                                                                                                                                                                                                                                             |
| Low fat milk           | Low fat milk                                                                                                                                                                                                                                                                                                                                                                                                                                                                                 |
| Whole milk             | Whole milk                                                                                                                                                                                                                                                                                                                                                                                                                                                                                   |
| Cream                  | Cream, sour cream, cream cheese, cream soup, ice cream                                                                                                                                                                                                                                                                                                                                                                                                                                       |
| Yogurt                 | Yogurt                                                                                                                                                                                                                                                                                                                                                                                                                                                                                       |
| Cheese                 | Cottage cheese, ricotta cheese, all other cheese                                                                                                                                                                                                                                                                                                                                                                                                                                             |
| Red meat               | Liver, hamburger, meat casserole, meat main dish                                                                                                                                                                                                                                                                                                                                                                                                                                             |
| Processed meat         | Bacon, hot dogs, processed meats                                                                                                                                                                                                                                                                                                                                                                                                                                                             |
| Chicken                | Chicken with and without skin                                                                                                                                                                                                                                                                                                                                                                                                                                                                |
| Fish                   | Canned tuna, dark fish, shrimp/shellfish, other fish                                                                                                                                                                                                                                                                                                                                                                                                                                         |
| Eggs                   | Eggs                                                                                                                                                                                                                                                                                                                                                                                                                                                                                         |
| Fruits and vegetables  | Oranges, orange juice, grapefruit, grapefruit juice, raisins, runes, bananas, cantaloupe, watermelon, apples, pears, apple juice, other fruit juice, strawberries, blueberries, peaches, tomatoes, tomato juice, tomato sauce, broccoli, cabbage/coleslaw, cauliflower, Brussels sprouts, carrots, corn, mixed vegetables, winter squash, summer squash, yams/sweet potatoes, spinach, kale/mustard greens/chard, iceberg lettuce, romaine lettuce, celery, beets, alfalfa sprouts, potatoes |
| Nuts                   | Peanut butter, nuts                                                                                                                                                                                                                                                                                                                                                                                                                                                                          |
| Cereal                 | Cold cereal, hot oatmeal, hot other cereal                                                                                                                                                                                                                                                                                                                                                                                                                                                   |
| Sweet baked products   | Muffins, biscuits, pancakes/waffles, cookies, brownies, doughnuts, cake, sweet roll, pie                                                                                                                                                                                                                                                                                                                                                                                                     |
| Pizza and French fries | Pizza and French fries                                                                                                                                                                                                                                                                                                                                                                                                                                                                       |
| Snacks                 | Chips, popcorn, crackers, candy, sherbet                                                                                                                                                                                                                                                                                                                                                                                                                                                     |
| White grains           | White bread, English muffins, bagels, white rice, pasta                                                                                                                                                                                                                                                                                                                                                                                                                                      |
| Whole grains           | Dark bread, brown rice, other grains, wheat germ, bran                                                                                                                                                                                                                                                                                                                                                                                                                                       |
| Other protein          | Breakfast bars, protein shakes, diet shakes containing protein                                                                                                                                                                                                                                                                                                                                                                                                                               |

63 <sup>1</sup> Foods listed in the table were from the food frequency questionnaire

64
